# Supplementary material
Source: MDPI journal article supplement (https://www.mdpi.com/2072-4292/13/11/2160)
Supplement: s1 [file s1]

Archive with 6 entries (6 files):
- Supplementary Table S1.pdf
- Supplementary Table S2.pdf
- Supplementary Table S3.pdf
- supplementary table S4.pdf
- Supplementary table S5.pdf
- Supplementary table S6.pdf
