# Supplementary material
Source: MDPI journal article supplement (https://www.mdpi.com/2072-4292/13/11/2160)
Supplement: s1 [file s1 › Supplementary Table S1.pdf]

**Supplementary Table S1 45 spectral absorption features and wavelength position variables  
acquired from leaf spectral reflectance**

| Number | Parameter                  | Explanations                                                                                                                                                                                                      |
|--------|----------------------------|-------------------------------------------------------------------------------------------------------------------------------------------------------------------------------------------------------------------|
| 1      | VIS- $\lambda_1$           | starting wavelength(nm) of visible band;                                                                                                                                                                          |
| 2      | VIS- $\lambda_2$           | ending wavelength(nm) of visible band;                                                                                                                                                                            |
| 3      | VIS- $\lambda_p$           | the absorption position (P) marks the wavelength at the deepest absorption in the region of visible wavelength, $\lambda_p$ is the corresponding wavelength;                                                      |
| 4      | VIS-DEP                    | the absorption depth (DEP) is the depth of the feature minimum relative to the hull in the region of visible wavelength;                                                                                          |
| 5      | VIS-Area                   | the absorption area (Area) is the area of the absorption feature that is the product of DEP and WID in the region of visible wavelength. The width of absorption (WID) is full wavelength width at half DEP (nm); |
| 6      | VIS-symmetry               | the symmetry of an absorption feature is derived as the ratio of the area left of the absorption center to the area right in the region of visible wavelength;                                                    |
| 7      | VIS-cslope                 | the slope of L in Figure 1 in the region of visible wavelength;                                                                                                                                                   |
| 8      | VIS-fwhm- $X_1$            | wavelength of left shoulder at the position of the full width half maximum in the region of visible wavelength;                                                                                                   |
| 9      | VIS-fwhm- $X_2$            | wavelength of right shoulder at the position of the full width half maximum in the region of visible wavelength;                                                                                                  |
| 10     | VIS-fwhm-Y                 | the corresponding reflectance of $X_1$ and $X_2$ in the region of visible wavelength;                                                                                                                             |
| 11     | VIS-fwhm- $\Delta \lambda$ | The width (W) defines the full width half maximum. $\Delta \lambda$ which represent the value of W is calculated by $X_2-X_1$ ;                                                                                   |
| 12     | VIS-SAI                    | spectrum absorption index in the region of visible wavelength;                                                                                                                                                    |
| 13     | SW1- $\lambda_1$           | starting wavelength(nm) of short wavelength 1230nm - 1650nm;                                                                                                                                                      |
| 14     | SW1- $\lambda_2$           | ending wavelength(nm) of short wavelength 1230nm - 1650nm;                                                                                                                                                        |
| 15     | SW1- $\lambda_p$           | the absorption position (P) marks the wavelength at the deepest absorption in the region of short wavelength 1230nm - 1650nm;                                                                                     |
| 16     | SW1-DEP                    | the absorption depth (DEP) is the depth of the feature minimum relative to the hull in the region of short wavelength 1230nm - 1650nm;                                                                            |
| 17     | SW1-Area                   | the absorption area (Area) is the area of the absorption feature that is the product of DEP and WID in the region of short wavelength 1230nm - 1650nm;                                                            |
| 18     | SW1-symmetry               | the symmetry of an absorption feature is derived as the ratio of the area left of the absorption center to the area right in the region of short wavelength 1230nm - 1650nm;                                      |
| 19     | SW1-cslope                 | the slope of L in Figure 1 in the region of short wavelength 1230nm - 1650nm;                                                                                                                                     |
| 20     | SW1-fwhm- $X_1$            | wavelength of left shoulder at the position of the full width half maximum in the region of short wavelength 1230nm - 1650nm;                                                                                     |
| 21     | SW1-fwhm- $X_2$            | wavelength of right shoulder at the position of the full width half                                                                                                                                               |

|    |                            |                                                                                                                                                                                                  |
|----|----------------------------|--------------------------------------------------------------------------------------------------------------------------------------------------------------------------------------------------|
| 22 | SW1-fwhm- $\Delta \lambda$ | maximum in the region of short wavelength 1230nm - 1650nm;<br>the width (W) defines the full width half maximum. $\Delta \lambda$ which<br>represent the value of W is calculated by $X_2-X_1$ ; |
| 23 | SW1-fwhm- P                | the absorption position (P) marks the wavelength at the deepest<br>absorption in the region of short wavelength 1230nm - 1650nm;                                                                 |
| 24 | SW1-SAI                    | spectrum absorption index in the region of short wavelength 1230nm<br>- 1650nm;                                                                                                                  |
| 25 | SW2- $\lambda_1$           | starting wavelength (nm) of short wavelength 1800nm-2200nm;                                                                                                                                      |
| 26 | SW2- $\lambda_2$           | ending wavelength(nm) of short wavelength 1800nm-2200nm;                                                                                                                                         |
| 27 | SW2- $\lambda_P$           | the absorption position (P) marks the wavelength at the deepest<br>absorption in the region of short wavelength 1800nm-2200nm;                                                                   |
| 28 | SW2-DEP                    | the absorption depth (DEP) is the depth of the feature minimum<br>relative to the hull in the region of short wavelength 1800nm-2200nm;                                                          |
| 29 | SW2-Area                   | the absorption area (Area) is the area of the absorption feature that is<br>the product of DEP and WID in the region of short wavelength<br>1800nm-2200nm;                                       |
| 30 | SW2-symmetry               | the symmetry of an absorption feature is derived as the ratio of the<br>area left of the absorption center to the area right in the region of short<br>wavelength 1800nm-2200nm;                 |
| 31 | SW2-cslope                 | the slope of L in Figure 1 in the region of short wavelength 1800nm-<br>2200nm;                                                                                                                  |
| 32 | SW2-fwhm- $X_1$            | wavelength of left shoulder at the position of the full width half<br>maximum in the region of short wavelength 1800nm-2200nm;                                                                   |
| 33 | SW2-fwhm- $X_2$            | wavelength of right shoulder at the position of the full width half<br>maximum in the region of short wavelength 1800nm-2200nm;                                                                  |
| 34 | SW2-fwhm-Y                 | the corresponding reflectance of $X_1$ and $X_2$ in the region of short<br>wavelength 1800 nm-2200nm;                                                                                            |
| 35 | SW2-fwhm- $\Delta \lambda$ | the width (W) defines the full width half maximum. $\Delta \lambda$ which<br>represent the value of W is calculated by $X_2-X_1$ ;                                                               |
| 36 | SW2-SAI                    | spectrum absorption index in the region of short wavelength 1800 nm-<br>2200nm;                                                                                                                  |
| 37 | $R_0$                      | the minimum spectral reflectance of the green edge;                                                                                                                                              |
| 38 | C                          | Gaussian fitting parameters for spectral reflectance in the green band;                                                                                                                          |
| 39 | $\lambda_g$                | the corresponding wavelength of green peak reflectance;                                                                                                                                          |
| 40 | $F_C$                      | spectral half-width coefficient from 500nm to $\lambda_0$ ;                                                                                                                                      |
| 41 | $R_s$                      | the maximum or “shoulder” spectral reflectance when the IG model<br>represents the red edge;                                                                                                     |
| 42 | $R_{02}$                   | the minimum spectral reflectance of the red edge;                                                                                                                                                |
| 43 | $\lambda_0$                | the corresponding wavelength of the minimum spectral reflectance<br>when the IG model represents the red edge;                                                                                   |
| 44 | $\sigma$                   | Gaussian function standard deviation coefficient;                                                                                                                                                |
| 45 | Rep                        | Red edge position;                                                                                                                                                                               |
