# Supplementary material
Source: MDPI journal article supplement (https://www.mdpi.com/2072-4292/13/11/2160)
Supplement: s1 [file s1 › Supplementary Table S2.pdf]

Supplementary Table S2 One-way ANOVA test results of stomatal conductance (*Cond*, mol m<sup>-2</sup>s<sup>-1</sup>) of upper layer, middle layer, and lower layer in different water stress. The data was presented in the form of mean ± standard error, significant differences were indicated by different letters in the same column.

| Time   | Water stress        | Upper layer         | Middle layer       | Lower layer         |
|--------|---------------------|---------------------|--------------------|---------------------|
| Day 1  | Normal water supply | 0.091243±0.015905a  | 0.103151±0.012838a | 0.157629±0.029078a  |
|        | Mild stress         | 0.054466±0.018994b  | 0.115063±0.041438a | 0.083163±0.041762b  |
|        | Moderate stress     | 0.059409±0.016852b  | 0.024709±0.021937b | 0.031548±0.025842c  |
|        | Heavy stress        | 0.043931±0.025603c  | 0.020043±0.008745b | 0.019761±0.00735c   |
| Day 7  | Normal water supply | 0.337291±0.119235a  | 1.182438±0.442297a | 1.870629±0.741505a  |
|        | Mild stress         | 0.055048±0.024271b  | 0.116484±0.082207b | 0.415122±0.282832b  |
|        | Moderate stress     | 0.022773±0.011785c  | 0.050189±0.013546b | 0.05385±0.017606b   |
|        | Heavy stress        | 0.016931±0.007414c  | 0.014498±0.00925b  | 0.025363±0.012658b  |
| Day 13 | Normal water supply | 0.140831±0.014538a  | 0.139955±0.147503a | 0.135156±0.044653a  |
|        | Mild stress         | 0.058494±0.007914b  | 0.192291±0.169282a | 0.112125±0.024021b  |
|        | Moderate stress     | 0.037114±0.005307b  | 0.067163±0.033621a | 0.084667±0.015458b  |
|        | Heavy stress        | 0.014107±0.000541c  | 0.010035±0.001697a | 0.022495±0.0050018c |
| Day 20 | Normal water supply | 0.081026±0.019756a  | 0.140112±0.039611a | 0.149919±0.057961a  |
|        | Mild stress         | 0.109548±0.039121a  | 0.129163±0.015545a | 0.088699±0.025538b  |
|        | Moderate stress     | 0.0383±0.005794b    | 0.075379±0.023403b | 0.053862±0.029438bc |
|        | Heavy stress        | 0.02515±0.004366b   | 0.013612±0.007205c | 0.011954±0.004912c  |
| Day 28 | Normal water supply | 0.169136±0.06598a   | 0.250859±0.089734a | 0.280794±0.058177a  |
|        | Mild stress         | 0.107305±0.070638ab | 0.134934±0.052496a | 0.180234±0.058417ab |
|        | Moderate stress     | 0.073295±0.015419b  | 0.172429±0.072722a | 0.172429±0.072722b  |
|        | Heavy stress        | 0.060159±0.03053b   | 0.149454±0.095921a | 0.125149±0.047633b  |
| Day 33 | Normal water supply | 0.079528±0.026081a  | 0.215134±0.084832a | 0.124294±0.056161a  |
|        | Mild stress         | 0.090643±0.024325a  | 0.206865±0.100605a | 0.167578±0.039478a  |
|        | Moderate stress     | 0.071303±0.010222a  | 0.140852±0.082101a | 0.116355±0.047717a  |
|        | Heavy stress        | 0.066886±0.016697a  | 0.105376±0.07083a  | 0.09038±0.083885a   |
