# Supplementary material
Source: MDPI journal article supplement (https://www.mdpi.com/2072-4292/13/11/2160)
Supplement: s1 [file s1 › Supplementary Table S3.pdf]

Supplementary Table S3 One-way ANOVA test results of leaf transpiration rate ( $Tr_{mmol}$ , mmol m<sup>-2</sup>s<sup>-1</sup>) of upper layer, middle layer, and lower layer in different water stress. The data was presented in the form of mean  $\pm$  standard error, significant differences were indicated by different letters in the same column.

| Time   | Water stress        | Upper layer              | Middle layer              | Lower layer               |
|--------|---------------------|--------------------------|---------------------------|---------------------------|
| Day 1  | Normal water supply | 3.882575 $\pm$ 0.708943a | 4.41205 $\pm$ 0.521864a   | 5.970026 $\pm$ 0.764144a  |
|        | Mild stress         | 2.659162 $\pm$ 0.855781b | 4.947039 $\pm$ 1.367637ab | 3.702979 $\pm$ 1.516549b  |
|        | Moderate stress     | 3.357001 $\pm$ 0.955045b | 1.707184 $\pm$ 1.546845c  | 2.016168 $\pm$ 1.665481bc |
|        | Heavy stress        | 1.404665 $\pm$ 1.332048c | 0.888815 $\pm$ 0.336749c  | 0.909964 $\pm$ 0.220956c  |
| Day 7  | Normal water supply | 5.347896 $\pm$ 1.037133a | 8.65574 $\pm$ 0.63643a    | 8.353969 $\pm$ 1.222102a  |
|        | Mild stress         | 1.573477 $\pm$ 0.583666b | 2.883692 $\pm$ 0.690048b  | 5.085208 $\pm$ 1.660906b  |
|        | Moderate stress     | 0.661437 $\pm$ 0.284158b | 1.458686 $\pm$ 0.395011c  | 1.551545 $\pm$ 0.47444c   |
|        | Heavy stress        | 0.469928 $\pm$ 0.182472b | 0.400963 $\pm$ 0.25801c   | 0.686836 $\pm$ 0.313027c  |
| Day 13 | Normal water supply | 3.422792 $\pm$ 0.44189a  | 3.136463 $\pm$ 1.917986ab | 4.126266 $\pm$ 1.252333a  |
|        | Mild stress         | 2.08572 $\pm$ 0.448948b  | 4.252417 $\pm$ 2.023974a  | 3.438743 $\pm$ 0.569303b  |
|        | Moderate stress     | 1.456064 $\pm$ 0.563179b | 2.33414 $\pm$ 1.164256ab  | 2.520217 $\pm$ 0.387406b  |
|        | Heavy stress        | 0.508425 $\pm$ 0.037403c | 0.402118 $\pm$ 0.084802c  | 0.856029 $\pm$ 0.293131c  |
| Day 20 | Normal water supply | 2.55987 $\pm$ 0.536771ab | 4.133889 $\pm$ 0.947069a  | 4.359417 $\pm$ 1.390474a  |
|        | Mild stress         | 3.076728 $\pm$ 0.957318a | 3.60923 $\pm$ 0.382118a   | 2.592435 $\pm$ 0.614512b  |
|        | Moderate stress     | 1.052561 $\pm$ 0.166029c | 2.003543 $\pm$ 0.642245b  | 1.496467 $\pm$ 0.82254bc  |
|        | Heavy stress        | 0.516773 $\pm$ 0.130573c | 0.277897 $\pm$ 0.102747c  | 0.256621 $\pm$ 0.066384c  |
| Day 28 | Normal water supply | 4.221187 $\pm$ 1.272763a | 5.811257 $\pm$ 1.087438a  | 6.54712 $\pm$ 0.933929a   |
|        | Mild stress         | 3.624871 $\pm$ 1.094617a | 4.546514 $\pm$ 1.012447a  | 5.690862 $\pm$ 1.400753a  |
|        | Moderate stress     | 2.847992 $\pm$ 0.54358a  | 5.624869 $\pm$ 1.091724a  | 5.519632 $\pm$ 1.528837a  |
|        | Heavy stress        | 2.441678 $\pm$ 1.146707a | 5.069779 $\pm$ 0.857694a  | 4.614689 $\pm$ 1.4664a    |
| Day 33 | Normal water supply | 2.185589 $\pm$ 0.604701a | 4.927252 $\pm$ 1.018451a  | 3.325198 $\pm$ 1.385692a  |
|        | Mild stress         | 2.743724 $\pm$ 0.581834a | 4.989258 $\pm$ 1.087863a  | 4.017215 $\pm$ 1.509311a  |
|        | Moderate stress     | 2.29517 $\pm$ 0.254669a  | 3.918413 $\pm$ 1.149289a  | 3.450554 $\pm$ 1.060461a  |
|        | Heavy stress        | 2.302221 $\pm$ 0.563026a | 3.26785 $\pm$ 1.10962a    | 2.877053 $\pm$ 1.165293a  |
