# Supplementary material
Source: MDPI journal article supplement (https://www.mdpi.com/2072-4292/13/11/2160)
Supplement: s1 [file s1 › supplementary table S4.pdf]

Supplementary Table S4 ANOVA results for the spectral parameters corresponding to Figure 6. SS: Sum of squares, DF: Degree of freedom; MS: Mean square.

| Parameters                  | Time   | SS       | DF | MS        | F value | P value  |
|-----------------------------|--------|----------|----|-----------|---------|----------|
| PRI                         | Day 1  | 0.04317  | 3  | 0.014389  | 37.69   | 3.19e-15 |
|                             | Day 7  | 0.01938  | 3  | 0.006460  | 24.20   | 9.08e-11 |
|                             | Day 13 | 0.02635  | 3  | 0.008783  | 38.57   | 1.12e-14 |
|                             | Day 20 | 0.01358  | 3  | 0.004527  | 27.01   | 1.29e-11 |
|                             | Day 28 | 0.002338 | 3  | 0.0007792 | 3.987   | 0.0112   |
|                             | Day 33 | 0.000305 | 3  | 0.0001017 | 0.421   | 0.739    |
| NDVI                        | Day 1  | 0.02814  | 3  | 0.009381  | 12.69   | 1.11e-06 |
|                             | Day 7  | 0.01156  | 3  | 0.003852  | 6.67    | 0.000515 |
|                             | Day 13 | 0.02814  | 3  | 0.009381  | 12.69   | 1.11e-06 |
|                             | Day 20 | 0.05531  | 3  | 0.018437  | 28.00   | 6.61e-12 |
|                             | Day 28 | 0.00485  | 3  | 0.001615  | 1.556   | 0.208    |
|                             | Day 33 | 0.00178  | 3  | 0.0005944 | 0.795   | 0.501    |
| RVI                         | Day 1  | 0.003052 | 3  | 0.0010173 | 3.069   | 0.0326   |
|                             | Day 7  | 0.003524 | 3  | 0.0011745 | 6.416   | 0.000684 |
|                             | Day 13 | 0.00924  | 3  | 0.0030800 | 12.60   | 1.21e-06 |
|                             | Day 20 | 0.0185   | 3  | 0.006165  | 27.57   | 8.81e-12 |
|                             | Day 28 | 0.001771 | 3  | 0.0005904 | 1.577   | 0.203    |
|                             | Day 33 | 0.00058  | 3  | 0.0001934 | 0.804   | 0.497    |
| GI                          | Day 1  | 0.1213   | 3  | 0.04043   | 6.437   | 0.000589 |
|                             | Day 7  | 0.09717  | 3  | 0.03239   | 11.79   | 2.61e-06 |
|                             | Day 13 | 0.1084   | 3  | 0.03612   | 5.841   | 0.00131  |
|                             | Day 20 | 0.2848   | 3  | 0.09493   | 28.19   | 5.86e-12 |
|                             | Day 28 | 0.04183  | 3  | 0.013944  | 6.804   | 0.000444 |
|                             | Day 33 | 0.0139   | 3  | 0.004626  | 0.474   | 0.702    |
| C                           | Day 1  | 6.115    | 3  | 2.0384    | 7.756   | 0.000132 |
|                             | Day 7  | 14.45    | 3  | 4.817     | 16.15   | 4.99e-08 |
|                             | Day 13 | 12.46    | 3  | 4.155     | 10.74   | 7.26e-06 |
|                             | Day 20 | 20.63    | 3  | 6.877     | 32.10   | 4.84e-13 |
|                             | Day 28 | 3.946    | 3  | 1.3155    | 4.383   | 0.00703  |
|                             | Day 33 | 0.87     | 3  | 0.2909    | 0.356   | 0.785    |
| NMDI                        | Day 1  | 0.00127  | 3  | 0.0004233 | 4.507   | 0.00569  |
|                             | Day 7  | 0.003823 | 3  | 0.0012744 | 7.33    | 0.00025  |
|                             | Day 13 | 0.008419 | 3  | 0.0028064 | 25.93   | 2.69e-11 |
|                             | Day 20 | 0.008388 | 3  | 0.002796  | 24.75   | 6.14e-11 |
|                             | Day 28 | 0.000121 | 3  | 4.040e-05 | 0.844   | 0.475    |
|                             | Day 33 | 0.000590 | 3  | 1.968e-04 | 2.533   | 0.065    |
| SW2-fwhm-<br>X <sub>1</sub> | Day 1  | 1367.90  | 3  | 456.00    | 66.65   | <2e-16   |
|                             | Day 7  | 83.78    | 3  | 27.925    | 6.188   | 0.000883 |
|                             | Day 13 | 156.41   | 3  | 52.14     | 89.50   | <2e-16   |
|                             | Day 20 | 224.86   | 3  | 74.95     | 57.71   | <2e-16   |
|                             | Day 28 | 18.69    | 3  | 6.229     | 6.864   | 0.000416 |

|                             |        |         |   |        |       |          |
|-----------------------------|--------|---------|---|--------|-------|----------|
| SW2-fwhm-<br>X <sub>1</sub> | Day 33 | 0.44    | 3 | 0.1467 | 0.096 | 0.962    |
|                             | Day 1  | 1049.00 | 3 | 349.7  | 10.76 | 5.25e-06 |
|                             | Day 7  | 1262.00 | 3 | 420.6  | 24.86 | 5.68e-11 |
|                             | Day 13 | 3606.00 | 3 | 1201.9 | 75.52 | <2e-16   |
|                             | Day 20 | 2299.00 | 3 | 766.3  | 37.16 | 2.47e-14 |
|                             | Day 28 | 21.60   | 3 | 7.198  | 0.692 | 0.56     |
|                             | Day 33 | 114.50  | 3 | 38.16  | 2.06  | 0.115    |
| VIS- $\lambda_p$            | Day 1  | 272.60  | 3 | 90.88  | 22.78 | 1e-10    |
|                             | Day 7  | 94.52   | 3 | 31.505 | 10.12 | 1.35e-05 |
|                             | Day 13 | 195.90  | 3 | 65.31  | 21.13 | 8.79e-10 |
|                             | Day 20 | 93.26   | 3 | 31.088 | 10.48 | 9.39e-06 |
|                             | Day 28 | 174.80  | 3 | 58.27  | 10.61 | 8.31e-06 |
|                             | Day 33 | 9.70    | 3 | 3.229  | 0.383 | 0.765    |
