# Supplementary material
Source: MDPI journal article supplement (https://www.mdpi.com/2072-4292/13/11/2160)
Supplement: s1 [file s1 › Supplementary table S5.pdf]

Supplementary Table S5 ANOVA results for the spectral parameters corresponding to Figure 7. SS: Sum of squares, DF: Degree of freedom; MS: Mean square.

| Parameters                | Time   | SS       | DF | MS        | F value | P value  |
|---------------------------|--------|----------|----|-----------|---------|----------|
| SW1-fwhm-Y                | Day 1  | 0.000356 | 3  | 0.0001187 | 0.323   | 0.809    |
|                           | Day 7  | 0.01673  | 3  | 0.005578  | 23.99   | 1.05e-10 |
|                           | Day 13 | 0.04185  | 3  | 0.013952  | 65.88   | 2e-16    |
|                           | Day 20 | 0.03702  | 3  | 0.012339  | 48.61   | 2e-16    |
|                           | Day 28 | 0.001221 | 3  | 0.0004070 | 2.842   | 0.0442   |
|                           | Day 33 | 0.000813 | 3  | 0.0002709 | 0.933   | 0.43     |
| SW1-fwhm- $\Delta\lambda$ | Day 1  | 12       | 3  | 4.012     | 0.23    | 0.875    |
|                           | Day 7  | 592.8    | 3  | 197.61    | 27.67   | 8.25e-12 |
|                           | Day 13 | 1043.9   | 3  | 348.0     | 44.74   | 4.4e-16  |
|                           | Day 20 | 855.5    | 3  | 285.17    | 30.94   | 9.93e-13 |
|                           | Day 28 | 16.16    | 3  | 5.386     | 1.21    | 0.313    |
|                           | Day 33 | 78.4     | 3  | 26.120    | 3.553   | 0.0193   |
| SW2-Area                  | Day 1  | 112      | 3  | 37.49     | 0.521   | 0.669    |
|                           | Day 7  | 2425     | 3  | 808.3     | 10.96   | 5.87e-06 |
|                           | Day 13 | 7812     | 3  | 2603.9    | 52.45   | 2e-16    |
|                           | Day 20 | 6412     | 3  | 2137.2    | 37.53   | 2e-14    |
|                           | Day 28 | 271.5    | 3  | 90.50     | 2.123   | 0.105    |
|                           | Day 33 | 123      | 3  | 40.85     | 0.649   | 0.587    |
| SW1-SAI                   | Day 1  | 0.109    | 3  | 0.03618   | 0.422   | 0.738    |
|                           | Day 7  | 2.818    | 3  | 0.9394    | 22.76   | 2.59e-10 |
|                           | Day 13 | 394      | 3  | 131.28    | 2.538   | 0.0638   |
|                           | Day 20 | 4.425    | 3  | 1.4748    | 41.99   | 1.8e-15  |
|                           | Day 28 | 0.2387   | 3  | 0.07957   | 2.877   | 0.0423   |
|                           | Day 33 | 0.180    | 3  | 0.06011   | 0.869   | 0.462    |
| SW2-fwhm-Y                | Day 1  | 0.000692 | 3  | 0.0002308 | 1.597   | 0.197    |
|                           | Day 7  | 0.003432 | 3  | 0.0011438 | 5.127   | 0.00295  |
|                           | Day 13 | 0.012642 | 3  | 0.004214  | 30.96   | 9.82e-13 |
|                           | Day 20 | 0.01233  | 3  | 0.004109  | 27.51   | 9.21e-12 |
|                           | Day 28 | 0.000729 | 3  | 0.0002429 | 1.75    | 0.165    |
|                           | Day 33 | 0.000336 | 3  | 0.0001118 | 0.705   | 0.553    |
| SW2-fwhm- $\Delta\lambda$ | Day 1  | 22       | 3  | 7.20      | 0.165   | 0.92     |
|                           | Day 7  | 1581     | 3  | 527.0     | 20.53   | 1.4e-09  |
|                           | Day 13 | 5256     | 3  | 1752      | 83.4    | 2e-16    |
|                           | Day 20 | 3962     | 3  | 1320.5    | 44.63   | 4.66e-16 |
|                           | Day 28 | 66.4     | 3  | 22.13     | 1.443   | 0.238    |
|                           | Day 33 | 120      | 3  | 40.01     | 1.415   | 0.247    |
| SW2-SAI                   | Day 1  | 30.2     | 3  | 10.078    | 1.781   | 0.158    |
|                           | Day 7  | 109.6    | 3  | 36.52     | 7.081   | 0.000328 |
|                           | Day 13 | 186.9    | 3  | 62.31     | 19.59   | 2.93e-09 |
|                           | Day 20 | 165.1    | 3  | 55.03     | 15.99   | 5.73e-08 |
|                           | Day 28 | 14.14    | 3  | 4.713     | 1.836   | 0.149    |

|          |        |          |   |           |       |          |
|----------|--------|----------|---|-----------|-------|----------|
|          | Day 33 | 15.7     | 3 | 5.232     | 1.126 | 0.346    |
| MSI      | Day 1  | 0.00494  | 3 | 0.001647  | 1.397 | 0.25     |
|          | Day 7  | 0.03140  | 3 | 0.010466  | 14.42 | 2.27e-07 |
|          | Day 13 | 0.08511  | 3 | 0.028371  | 30.08 | 1.72e-12 |
|          | Day 20 | 0.04541  | 3 | 0.01514   | 14.7  | 1.77e-07 |
|          | Day 28 | 0.001998 | 3 | 0.0006658 | 1.738 | 0.168    |
|          | Day 33 | 0.00469  | 3 | 0.0015646 | 1.838 | 0.15     |
| NDWI1640 | Day 1  | 0.00155  | 3 | 0.0005158 | 0.904 | 0.443    |
|          | Day 7  | 0.01447  | 3 | 0.004824  | 13.26 | 6.57e-07 |
|          | Day 13 | 0.03594  | 3 | 0.011979  | 24.98 | 5.21e-11 |
|          | Day 20 | 0.01800  | 3 | 0.006000  | 12.02 | 2.09e-06 |
|          | Day 28 | 0.001056 | 3 | 0.0003519 | 1.92  | 0.135    |
|          | Day 33 | 0.002619 | 3 | 0.0008729 | 2.01  | 0.122    |
