# Supplementary material
Source: MDPI journal article supplement (https://www.mdpi.com/2072-4292/13/11/2160)
Supplement: s1 [file s1 › Supplementary table S6.pdf]

Supplementary Table S6 ANOVA results for the spectral parameters corresponding to table 2. SS: Sum of squares, DF: Degree of freedom; MS: Mean square.

| Parameters              | SS        | DF | MS        | F value | P value  |
|-------------------------|-----------|----|-----------|---------|----------|
| GI                      | 0.04183   | 3  | 0.013944  | 6.804   | 0.000444 |
| CI <sub>730</sub>       | 0.02377   | 3  | 0.007922  | 7.61    | 0.000185 |
| CI <sub>709</sub>       | 0.7181    | 3  | 0.23936   | 6.75    | 0.000472 |
| CIG                     | 7.174     | 3  | 2.3915    | 6.676   | 0.000512 |
| NDRE                    | 0.004223  | 3  | 0.0014075 | 7.627   | 0.000181 |
| rg                      | 0.004361  | 3  | 0.0014538 | 4.087   | 0.00996  |
| CARI                    | 1.008     | 3  | 0.3361    | 3.241   | 0.0273   |
| MCTI                    | 0.940     | 3  | 0.31326   | 6.219   | 0.000852 |
| PRI                     | 0.002338  | 3  | 0.0007792 | 3.987   | 0.0112   |
| VIS- $\lambda_2$        | 39.98     | 3  | 13.325    | 6.46    | 0.000651 |
| VIS- $\lambda_p$        | 174.8     | 3  | 58.27     | 10.61   | 8.31e-06 |
| VIS-Area                | 345.3     | 3  | 115.09    | 4.073   | 0.0101   |
| VIS-symmetry            | 0.008378  | 3  | 0.0027926 | 9.475   | 2.6e-05  |
| VIS-cslope              | 6.937e-07 | 3  | 2.312e-07 | 6.633   | 0.000537 |
| VIS-fwhm-X <sub>1</sub> | 72.15     | 3  | 24.051    | 6.821   | 0.000436 |
| VIS-fwhm-Y              | 0.000755  | 3  | 0.0002518 | 1.406   | 0.248    |
| SW1- $\lambda_1$        | 100.1     | 3  | 33.36     | 7.877   | 0.000139 |
| SW2- $\lambda_1$        | 67.43     | 3  | 22.478    | 9.675   | 2.12e-05 |
| SW2-cslope              | 6.660e-09 | 3  | 2.221e-09 | 4.388   | 0.00698  |
| SW2-fwhm-X <sub>1</sub> | 18.69     | 3  | 6.229     | 6.864   | 0.000416 |
| C                       | 3.946     | 3  | 1.315     | 4.383   | 0.00703  |
| $\lambda_g$             | 3.552     | 3  | 1.1839    | 9.02    | 4.15e-05 |
| $\lambda_0$             | 13.89     | 3  | 4.629     | 6.834   | 0.00043  |
| $\sigma$                | 14.27     | 3  | 4.757     | 6.151   | 0.00092  |
